# Supplementary material
Source: PubMed Central journal article supplement (PMC5529599)
Supplement: NIHMS879444-supplement-Table1.pdf [file NIHMS879444-supplement-Table1.pdf]

**Supplementary Table 1: Diagnostic criteria for patients with OI**

| <b>OI type</b> | <b>Clinical features</b>                                                                                | <b>Inheritance</b> | <b>Biochem.Abn</b>                                                  | <b>Mutation</b>                |
|----------------|---------------------------------------------------------------------------------------------------------|--------------------|---------------------------------------------------------------------|--------------------------------|
| I              | Normal stature, little or no deformity, blue sclerae, hearing loss                                      | AD                 | 50% reduction in type I collagen synthesis                          | <i>COL1A1</i>                  |
| II             | Lethal; minimal calvarial mineralization, beaded ribs, compressed femurs, long bone deformity           | AD                 | Structural alterations of type I collagen chains - overmodification | <i>COL1A1</i><br><i>COL1A2</i> |
| III            | Progressively deforming bones, DI, hearing loss, very short stature                                     | AD                 | Structural alterations of type I collagen chains – overmodification | <i>COL1A1</i><br><i>COL1A2</i> |
| IV             | Normal sclerae in adult, mild/moderate deformity, variable short stature, DI, some hearing loss         | AD                 | Structural alterations of type I collagen chains – overmodification | <i>COL1A1</i><br><i>COL1A2</i> |
| V              | Similar to type IV plus calcification of interosseus membrane of forearm, hyperplastic callus formation | AD                 | None described                                                      | <i>IFITM5</i>                  |
| VI             | Similar to type IV with vertebral compression; mineralization defect                                    | AR                 | None described                                                      | <i>SERPINF1</i>                |
| VII            | Moderate to severe, with fractures at birth, early deformity and rhizomelia                             | AR                 | Overmodification                                                    | <i>CRTAP</i>                   |

\*Patients classified into as type III and IV OI on a clinical basis were reclassified into appropriate subtypes when genotype information was available.
