# Supplementary material
Source: PubMed Central journal article supplement (PMC5529599)
Supplement: NIHMS879444-supplement-Table2.pdf [file NIHMS879444-supplement-Table2.pdf]

**Supplementary Table 2: Features used for diagnosis and classification of OI in the absence of biochemical or molecular studies**

**Clinical features**

| Type | Inheritance | Severity         | Fractures                                                                                                 | Bone Deformity        | Stature                             | DI   | Sclerae        | Hearing Loss         |
|------|-------------|------------------|-----------------------------------------------------------------------------------------------------------|-----------------------|-------------------------------------|------|----------------|----------------------|
| I    | AD          | Mild             | Few to 100                                                                                                | Uncommon              | Normal or slightly short for family | Rare | Blue           | Present in about 50% |
| II   | AD          | Perinatal lethal | Multiple rib fractures, minimal calvarial mineralization, platyspondyly, marked compression of long bones | Severe                | Severely short stature              | +    | Dark blue      | —                    |
| III  | AD          | Severe           | Thin ribs, platyspondyly, thin gracile bones with many fractures, "popcorn" epiphyses common              | Moderate to severe    | Very short                          | +    | Blue           | Frequent             |
| IV   | AD          | Moderate to mild | Multiple                                                                                                  | Mild to moderate      | Variably short stature              | +/-  | Normal to grey | Some                 |
| V    | AD          | Moderate         | Multiple with hypertrophic callus                                                                         | Moderate              | Variable                            | No   | Normal         | No                   |
| VI   | AR          | Moderate         | Multiple                                                                                                  | Rhizomelic shortening | Mild short stature                  | No   | Normal         | No                   |
| VII  | AR          | Moderate         | Multiple                                                                                                  | Yes                   | Short stature                       | No   | Bluish         | No                   |

### Radiologic features

| Type | Severity         | Skull                                         | Back                              | Extremities                                                                                           | Other                                         |
|------|------------------|-----------------------------------------------|-----------------------------------|-------------------------------------------------------------------------------------------------------|-----------------------------------------------|
| I    | Mild             | Wormian bones                                 | Codfish vertebrae (adults)        | Thin cortices                                                                                         | Osteopenia                                    |
| II   | Perinatal lethal | Undermineralization; plaques of calcification | Platyspondyly                     | Severely deformed; broad, crumpled, bent femurs                                                       | Small beaded ribs; findings are pathognomonic |
| III  | Severe           | Wormian bones                                 | Codfish vertebrae; kyphoscoliosis | Flared metaphyses ("popcorn"-like appearance [childhood]), bowing, thin cortices                      | Thin ribs, severe osteoporosis                |
| IV   | Intermediate     | ± Wormian bones                               | Codfish vertebrae                 | Thin cortices                                                                                         | Protrusio acetabuli                           |
| V    | Intermediate     | ?Wormian bones                                | ?                                 | Hypertrophic callus, usually of the femurs; mineralization of the interosseus membrane in the forearm |                                               |
| VI   | Intermediate     | ?Wormian bones                                | ?                                 | Similar to OI type IV                                                                                 |                                               |
| VII  | Intermediate     | ?Wormian bones                                | ?                                 | Similar to OI type IV                                                                                 | Rhizomelic shortening                         |
